# Supplementary material
Source: Elsevier journal article supplement (https://www.sciencedirect.com/science/article/pii/S0034935614001133)
Supplement: mmc1 [file S0034935614001133:mmc1.pdf]

## ANEXO

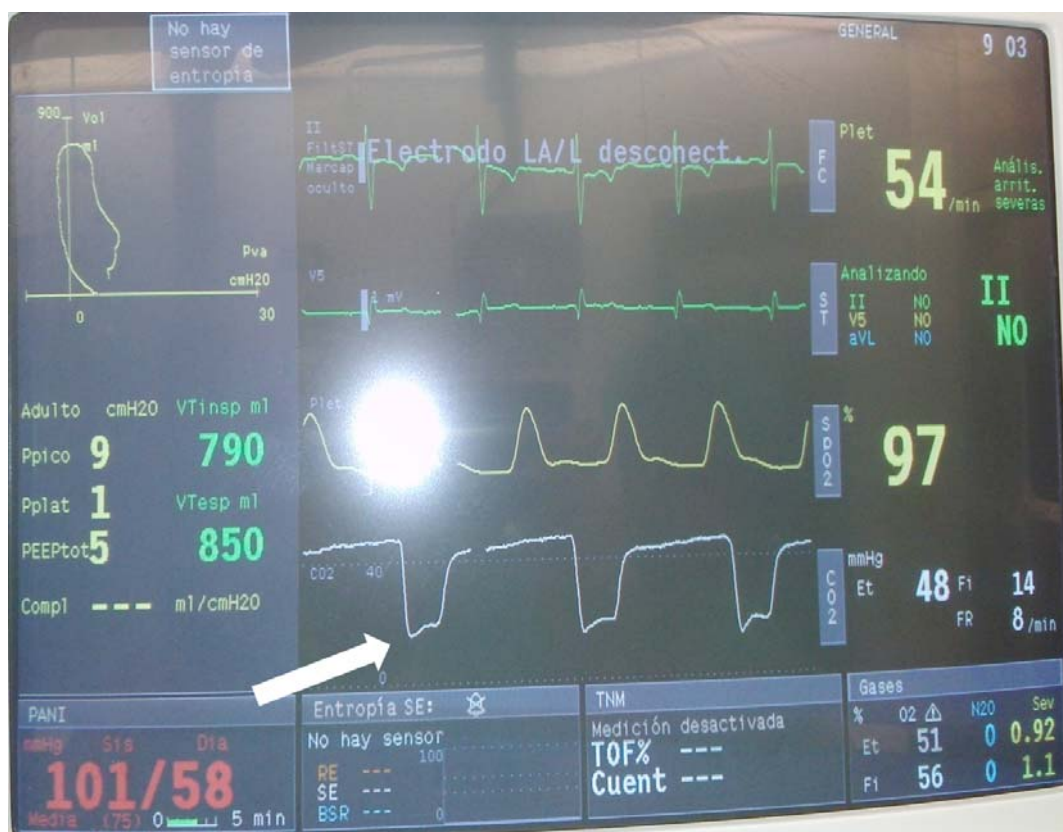

Monitorización intraoperatoria. Ventilación en modo Volumen Control con VT aumentado hasta 750 mL y FGF de 12 L/min. Reinhalación de CO<sub>2</sub> (Flecha). FiCO<sub>2</sub> de 14 mmHg. Valores anómalos de presiones de vía aérea y curva de P-V desplazada a la izquierda.

### NOTA DE LOS AUTORES

Se comunicó el incidente a la empresa responsable de la EA a través de su página web oficial sin obtenerse hasta la fecha ninguna respuesta. Por otro lado, el responsable del mantenimiento de la EA de nuestro centro, confirma que la no detección del problema es posible porque el circuito se mantiene estanco, sin fugas ya que el flujo recircula continuamente, sin tener esta EA un sistema de alerta de la dirección del flujo. En relación al sensor de O<sub>2</sub>, no es posible detectar una incorrecta posición durante el chequeo automático ya que la concentración de O<sub>2</sub> es igual en ambas ramas durante el periodo de prueba con el "pulmón artificial". Ambos errores de montaje tan sólo pueden detectarse mediante una inspección visual dirigida.
